# Supplementary material for: Unveiling the Role of RNA Recognition Motif Proteins in Orchestrating Nucleotide-Binding Site and Leucine-Rich Repeat Protein Gene Pairs and Chloroplast Immunity Pathways: Insights into Plant Defense Mechanisms
Source: MDPI journal article supplement (doi:10.3390/ijms25105557), 2024-05-20
Supplement: s1 [file s1]

**Supplementary Table S1.** Primers used in this study.

| Name                      | Sequence                                                     | Purpose                 |
|---------------------------|--------------------------------------------------------------|-------------------------|
| ko- <i>OsRRM2</i> F       | gccGAGAAGAGCGTGGCCGCCAT                                      | Adaptor for Cas9 system |
| ko- <i>OsRRM2</i> R       | aaacATGGCGGCCACGCTCTTCTC                                     | Adaptor for Cas9 system |
| gfp- <i>OsRRM2</i> F      | ggagaggacagcccagatcaactagtATGGCGGCCACGC                      | HR-PCR for pAN580       |
| gfp- <i>OsRRM2</i> R      | tcctcgcccttgctcaccatggatccATATTGTCTCCTAGGTGGT<br>TTCG        | HR-PCR for pAN580       |
| gfp- <i>Pik1-H4</i> F     | ggagaggacagcccagatcaactagtATGGAGGCGGCTGC                     | HR-PCR for pAN580       |
| gfp- <i>Pik1-H4</i> R     | tcctcgcccttgctcaccatggatccGCTAGTAGTTTCTGTTTGA<br>ATTTCAATATC | HR-PCR for pAN580       |
| gfp- <i>Pik2-H4</i> F     | ggagaggacagcccagatcaactagtATGGAGTTGGTGGTAGG<br>TG            | HR-PCR for pAN580       |
| gfp- <i>Pik2-H4</i> R     | tcctcgcccttgctcaccatggatccTGCAGTGACGATGCCATC                 | HR-PCR for pAN580       |
| his- <i>Pik1-H4</i> F     | GTGGACAGCAAATGGGTCGCGGATCCATGGAGGC<br>GGCTGC                 | HR-PCR for pET28a       |
| his- <i>Pik1-H4</i> R     | CAGTGGTGGTGGTGGTGGTGGTCTCGAGGCTAGTAGT<br>TTCTGTTTGAATTTCAAT  | HR-PCR for pET28a       |
| his- <i>Pik2-H4</i> F     | GTGGACAGCAAATGGGTCGCGGATCCATGGAGTT<br>GGTGGTAGGTGC           | HR-PCR for pET28a       |
| his- <i>Pik2-H4</i> R     | CAGTGGTGGTGGTGGTGGTGGTCTCGAGTGCAGTGA<br>CGATGCCATCA          | HR-PCR for pET28a       |
| ad- <i>OsRRM2</i> F       | GTACCAGATTACGCTCATATGATGGCGGCCACGCT<br>CTT                   | HR-PCR for pGADT7       |
| ad- <i>OsRRM2</i> R       | CAGCTCGAGCTCGATGGATCCTCAATATTGTCTCC<br>TAGGTG                | HR-PCR for pGADT7       |
| ad- <i>Pik1-H4</i> -CC F  | acgacgtaccagattacgctcatatgATGGAGGCGGCTGCCATG                 | HR-PCR for pGADT7       |
| ad- <i>Pik1-H4</i> -CC R  | tatcgatgccacccgggtggaattcTGTTTTTCTGAGCGGGAA<br>ATGCGG        | HR-PCR for pGADT7       |
| ad- <i>Pik1-H4</i> -HMA F | acgacgtaccagattacgctcatatgGGGCTAAAGCAAAAAAT<br>CGTGATCAAGG   | HR-PCR for pGADT7       |
| ad- <i>Pik1-H4</i> -HMA R | tatcgatgccacccgggtggaattcCACATCTTTTTTTGCTTGG<br>CTGACCT      | HR-PCR for pGADT7       |
| ad- <i>Pik2-H4</i> -NBS F | taccagattacgctcatatgAAGACGGTCATGGAGGAGCTTG<br>AGGT           | HR-PCR for pGADT7       |
| ad- <i>Pik2-H4</i> -NBS R | tgccacccgggtggaattcCAGGCCTTTTGTGAACTTCCA<br>CGAT             | HR-PCR for pGADT7       |
| ad- <i>Pik2-H4</i> -LRR F | taccagattacgctcatatgAACTTGGCTCAAGTGAGATCAC<br>TGAC           | HR-PCR for pGADT7       |

Continued Supplementary Table S1:

|                               |                                                          |                      |
|-------------------------------|----------------------------------------------------------|----------------------|
| ad- <i>Pik2-H4</i> -<br>LRR R | tgccacccgggtggaattcTCATGCAGTGACGATGCCATCA<br>ACAA        | HR-PCR for<br>pGADT7 |
| ad- <i>OsRRM2</i> -<br>1 F    | taccagattacgctcatatgATGGCGGCCACGC                        | HR-PCR for<br>pGADT7 |
| ad- <i>OsRRM2</i> -<br>1 R    | agctcgagctcgatggatcctcaCCTCAGGTCGTCGGAG                  | HR-PCR for<br>pGADT7 |
| ad- <i>OsRRM2</i> -<br>2 F    | taccagattacgctcatatgGTCTTCGTCGGCAACCT                    | HR-PCR for<br>pGADT7 |
| ad- <i>OsRRM2</i> -<br>2 R    | agctcgagctcgatggatcctcaCCTGTTGGCCTCACCC                  | HR-PCR for<br>pGADT7 |
| ad- <i>OsRRM2</i> -<br>3 F    | taccagattacgctcatatgGTCTATGTAGGTAACCTTTCTTG<br>GG        | HR-PCR for<br>pGADT7 |
| ad- <i>OsRRM2</i> -<br>3 R    | agctcgagctcgatggatccTCAATATTGTCTCCTAGGTGGTT              | HR-PCR for<br>pGADT7 |
| bd- <i>OsRRM2</i><br>F        | TCAGAGGAGGACCTGCATATGATGGCGGCCACGC<br>TCTT               | HR-PCR for<br>pGBKT7 |
| bd- <i>OsRRM2</i><br>R        | CCGCTGCAGGTCGACGGATCCTCAATATTGTCTCC<br>TAGGTG            | HR-PCR for<br>pGBKT7 |
| bd- <i>OsBIHD1</i><br>F       | TCAGAGGAGGACCTGCATATGATGGCTACTTACTA<br>CTCGAG            | HR-PCR for<br>pGBKT7 |
| bd- <i>OsBIHD1</i><br>R       | CCGCTGCAGGTCGACGGATCCTTAGGCCACAAAA<br>TCATGCAT           | HR-PCR for<br>pGBKT7 |
| bd- <i>Pik2-H4</i> F          | TCAGAGGAGGACCTGCATATGATGGAGTTGGTGGT<br>AGGTGCTTCCGAAG    | HR-PCR for<br>pGBKT7 |
| bd- <i>Pik2-H4</i> R          | CCGCTGCAGGTCGACGGATCCTCATGCAGTGACG<br>ATGCCATCAACAAAT    | HR-PCR for<br>pGBKT7 |
| bd- <i>Pik1-H4</i> -<br>CC F  | tgatctcagaggaggacctgcatatgATGGAGGCGGCTGCCATG             | HR-PCR for<br>pGBKT7 |
| bd- <i>Pik1-H4</i> -<br>CC R  | gcaggtcgacggatccccggaattcTGTTTTTCTGAGCGGGAA<br>ATGCGG    | HR-PCR for<br>pGBKT7 |
| bd- <i>Pik1-H4</i> -<br>HMA F | tgatctcagaggaggacctgcatatgCACATCTTTTTTTGCTTGG<br>CTGACCT | HR-PCR for<br>pGBKT7 |
| bd- <i>Pik1-H4</i> -<br>HMA R | gcaggtcgacggatccccggaattcCACATCTTTTTTTGCTTGG<br>CTGACCT  | HR-PCR for<br>pGBKT7 |
| bd- <i>Pik2-H4</i> -<br>LRR F | cagaggaggacctgcatatgAACTTGGCTCAAGTGAGATCA<br>CTGAC       | HR-PCR for<br>pGBKT7 |
| bd- <i>Pik2-H4</i> -<br>LRR R | cgacggatccccggaattcTCATGCAGTGACGATGCCATCA<br>ACAA        | HR-PCR for<br>pGBKT7 |
| bd- <i>OsRRM2</i> -<br>1 F    | cagaggaggacctgcatatgATGGCGGCCACGC                        | HR-PCR for<br>pGBKT7 |
| bd- <i>OsRRM2</i> -<br>1 R    | cgctgcaggtcgacggatcctcaCCTCAGGTCGTCGGAG                  | HR-PCR for<br>pGBKT7 |

Continued Supplementary Table S1:

|                             |                                                           |                               |
|-----------------------------|-----------------------------------------------------------|-------------------------------|
| bd-<br><i>OsRRM2-2</i><br>F | cagaggaggacctgcatatgGTCTTCGTCGGCAACCT                     | HR-PCR for<br>pGBKT7          |
| bd-<br><i>OsRRM2-2</i><br>R | cgctgcaggtcgacggatcctcaCCTGTTGGCCTCACCC                   | HR-PCR for<br>pGBKT7          |
| bd-<br><i>OsRRM2-3</i><br>F | cagaggaggacctgcatatgGTCTATGTAGGTAACCTTTCT<br>TGGG         | HR-PCR for<br>pGBKT7          |
| bd-<br><i>OsRRM2-3</i><br>R | cgctgcaggtcgacggatccTCAATATTGTCTCCTAGGTGG<br>TT           | HR-PCR for<br>pGBKT7          |
| gst-<br><i>OsRRM2</i> F     | CGCGTGGATCCCCGGAATTCATGGCGGCCACGC                         | HR-PCR for pGEX-<br>4T-1      |
| gst-<br><i>OsRRM2</i><br>R  | TCACGATGCGGCCGCTCGAGATATTGTCTCCTAG<br>GTGGTTTCG           | HR-PCR for pGEX-<br>4T-1      |
| oe-<br><i>OsRRM2</i> F      | GTTTGGTGTACTTCTGCAGATGGCGGCCACGC                          | HR-PCR for pOX-<br>GFP        |
| oe-<br><i>OsRRM2</i><br>R   | CCCTTGCTCACCATACGCGTATATTGTCTCCTAG<br>GTGGTTTCG           | HR-PCR for pOX-<br>GFP        |
| cy- <i>Pik1-H4</i><br>F     | ttggagagaacacgggggactctagaATGGAGGCGGCTGC                  | HR-PCR for pUC-<br>CE1R2R-nsI |
| cy- <i>Pik1-H4</i><br>R     | catcccgaggagcggtaccctcgagGCTAGTAGTTTCTGTTTG<br>AATTTC AAT | HR-PCR for pUC-<br>CE1R2R-nsI |
| cy- <i>Pik2-H4</i><br>F     | ttggagagaacacgggggactctagaATGGAGTTGGTGGTAG<br>GTG         | HR-PCR for pUC-<br>CE1R2R-nsI |
| cy- <i>Pik2-H4</i><br>R     | catcccgaggagcggtaccctcgagTGCAGTGACGATGCCA                 | HR-PCR for pUC-<br>CE1R2R-nsI |
| cy-<br><i>OsRRM2</i> F      | ttggagagaacacgggggactctagaATGGCGGCCACGC                   | HR-PCR for pUC-<br>CE1R2R-nsI |
| cy-<br><i>OsRRM2</i><br>R   | catcccgaggagcggtaccctcgagATATTGTCTCCTAGGTGG<br>TTTCG      | HR-PCR for pUC-<br>CE1R2R-nsI |
| cfp- <i>Pik1-H4</i> F       | CTTCGAATTCTGCAGTCGACATGGAGGCGGCTGC                        | HR-PCR for pUC-<br>CFP        |
| cfp- <i>Pik1-H4</i> R       | ACTCTAGATCAGGTGGATCCCTAGCTAGTAGTTT<br>CTGTTTGAATTTC AATAT | HR-PCR for pUC-<br>CFP        |
| t-Ubi F                     | TCTTTT TAGTGTGCATGTGTTCTCC                                | PCR test                      |
| t- <i>OsRRM2</i><br>R       | GCAACTAGACACAATCATT CATCACC                               | PCR test                      |
| q- <i>PR1a</i> F            | CGGAGAAGCAGTGGTACGA                                       | qRT-PCR                       |

Continued Supplementary Table S1:

|                 |                                                       |                 |        |
|-----------------|-------------------------------------------------------|-----------------|--------|
| q-PR1a R        | TGATGAAGACGCCGAGGTC                                   | qRT-PCR         |        |
| q-PR1b F        | GAACAACCTTGGCGAGAA                                    | qRT-PCR         |        |
| q-PR1b R        | TTGGAGGCGTAGTCGTAG                                    | qRT-PCR         |        |
| q-PR10 F        | CTTCATCGACGCCATTGA                                    | qRT-PCR         |        |
| q-PR10 R        | GAACCTCTGACTTGATAATGTG                                | qRT-PCR         |        |
| q-OsRRM2<br>F   | GAAGGGGAGGTCTTGGAAGC                                  | qRT-PCR         |        |
| q-OsRRM2<br>R   | ATCCATGTCAGCGCCATCAA                                  | qRT-PCR         |        |
| q-RAC1 F        | ATGTGCTCTTCTGGATGGCT                                  | qRT-PCR         |        |
| q-RAC1 R        | GAAAAGGTTGAAGCATGTGGCT                                | qRT-PCR         |        |
| q-GAP1 F        | TGCTATTGGTCTCAGCATTGGA                                | qRT-PCR         |        |
| q-GAP1 R        | TGTGTTGACCCGGGTTTGAT                                  | qRT-PCR         |        |
| q-CPK12 F       | TCGAATTCACAGGACGGGAGA                                 | qRT-PCR         |        |
| q-CPK12 R       | TTTTGCGTTTCATCTGCTTGC                                 | qRT-PCR         |        |
| q-EIL1A F       | GCGACGATACTCCATTCGGT                                  | qRT-PCR         |        |
| q-EIL1A R       | AGTACCAATTCGAGCCGTCA                                  | qRT-PCR         |        |
| q-APX8 F        | AACCACTGCTCAAGCGTGTA                                  | qRT-PCR         |        |
| q-APX8 R        | TCGTGCGAAATGGGTCTTCA                                  | qRT-PCR         |        |
| q-DJA6 F        | AGTGGTGGATGAGCATTCGT                                  | qRT-PCR         |        |
| q-DJA6 R        | ACAGAGACGCATCGAAGACC                                  | qRT-PCR         |        |
| q-RBOHB F       | GACCCATTTCGCACGACCTA                                  | qRT-PCR         |        |
| q-RBOHB R       | TGCAATGGATCATGGACATTCCT                               | qRT-PCR         |        |
| q-Actin F       | GATTGCCAAGGCTGAGTACG                                  | qRT-PCR         |        |
| q-Actin R       | AAAAGAAGAAACAAGCAGGAT                                 | qRT-PCR         |        |
| q-OsPBZ1 F      | CGCCGCAAGTCATGTCCTAA                                  | qRT-PCR         |        |
| q-OsPBZ1 R      | CCACGATGTCCTTCTCCTTCTC                                | qRT-PCR         |        |
| SELEX F         | cgTAATACGACTCACTATAGGGATTACGCCAAG<br>CTT              | SELEX PCR       |        |
| SELEX R         | GGTACCCGGGGATCC                                       | SELEX PCR       |        |
| SELEX-<br>Oligo | ggGATTACGCCAAGCTT(N) <sub>40</sub><br>GGATCCCCGGGTACC | SELEX<br>primer | random |

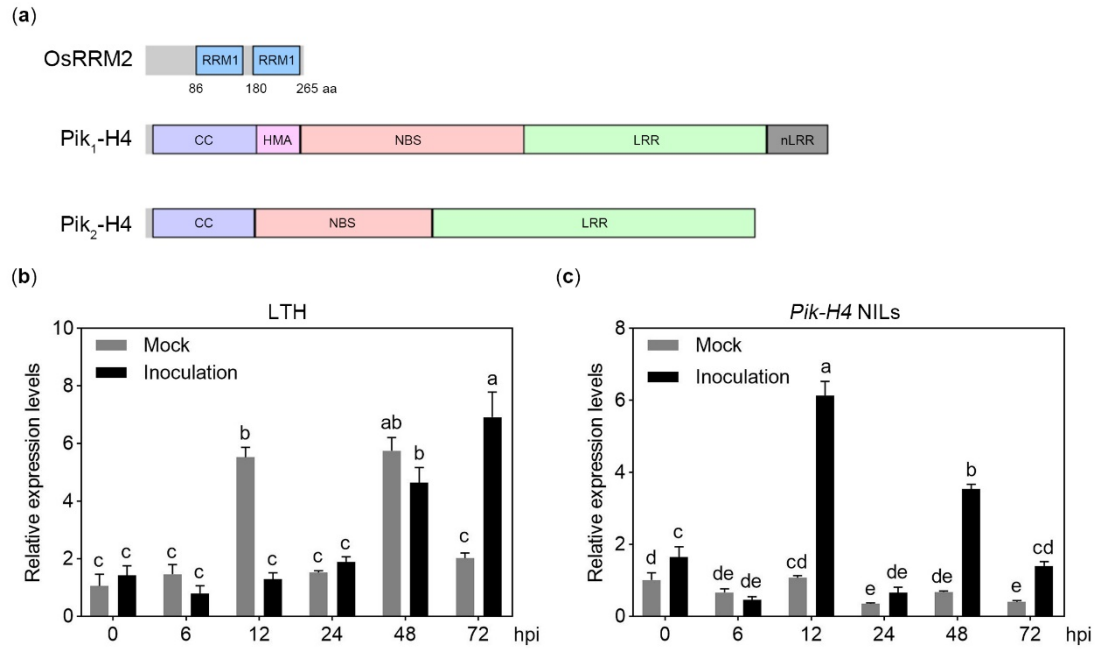

**Supplementary Figure S1.** OsRRM2 domain and expression pattern post-inoculation. (a) The protein plots of OsRRM2, Pik<sub>1</sub>-H4 and Pik<sub>2</sub>-H4. The OsRRM2 structure was analyzed by Pfam; (b) The expression pattern of *OsRRM2* upon rice blast inoculation in LTH; (c) The expression pattern of *OsRRM2* upon rice blast inoculation in *Pik-H4* NILs. The values are shown as mean  $\pm$  SD (n=3).  $\beta$ -actin was tested as an internal reference, the 0 hpi mock treatment groups were regarded as the control groups. The lowercase letters (a, b, c, etc.) indicate the data were at  $P < 0.01$  level according to one-way ANOVA with Dunnett's test.

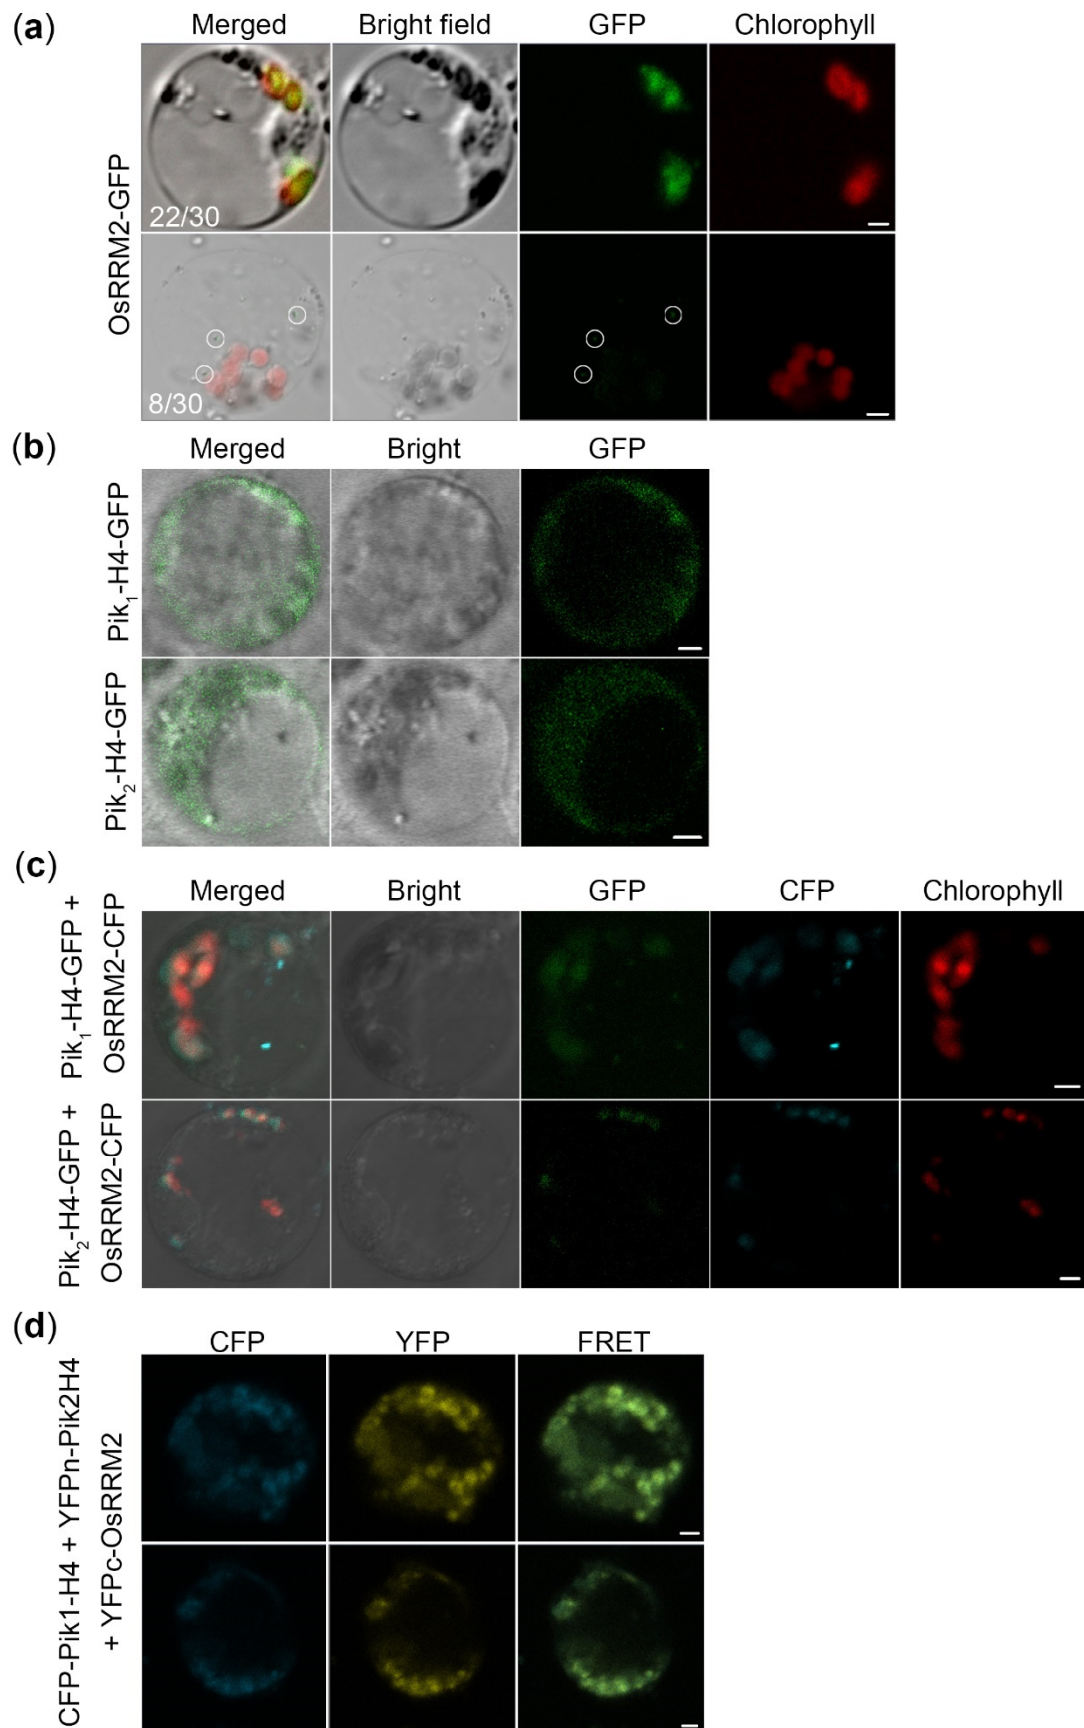

**Supplementary Figure S2.** Subcellular location of OsRRM2, Pik<sub>1</sub>-H4 and Pik<sub>2</sub>-H4. (a) Subcellular location of OsRRM2-GFP. The numbers represent the cells observed in this study.

n=30; (b) Subcellular location of Pik<sub>1</sub>-H4-GFP and Pik<sub>2</sub>-H4-GFP; (c) Co-location of OsRRM2-CFP with Pik<sub>1</sub>-H4-GFP or Pik<sub>2</sub>-H4-GFP; (d) FRET assays of CFP-Pik<sub>1</sub>-H4, YFPn-Pik<sub>2</sub>-H4 and YFPc-OsRRM2. The FRET channels were excited by 405 nm only. Scale bars = 5  $\mu$ m.

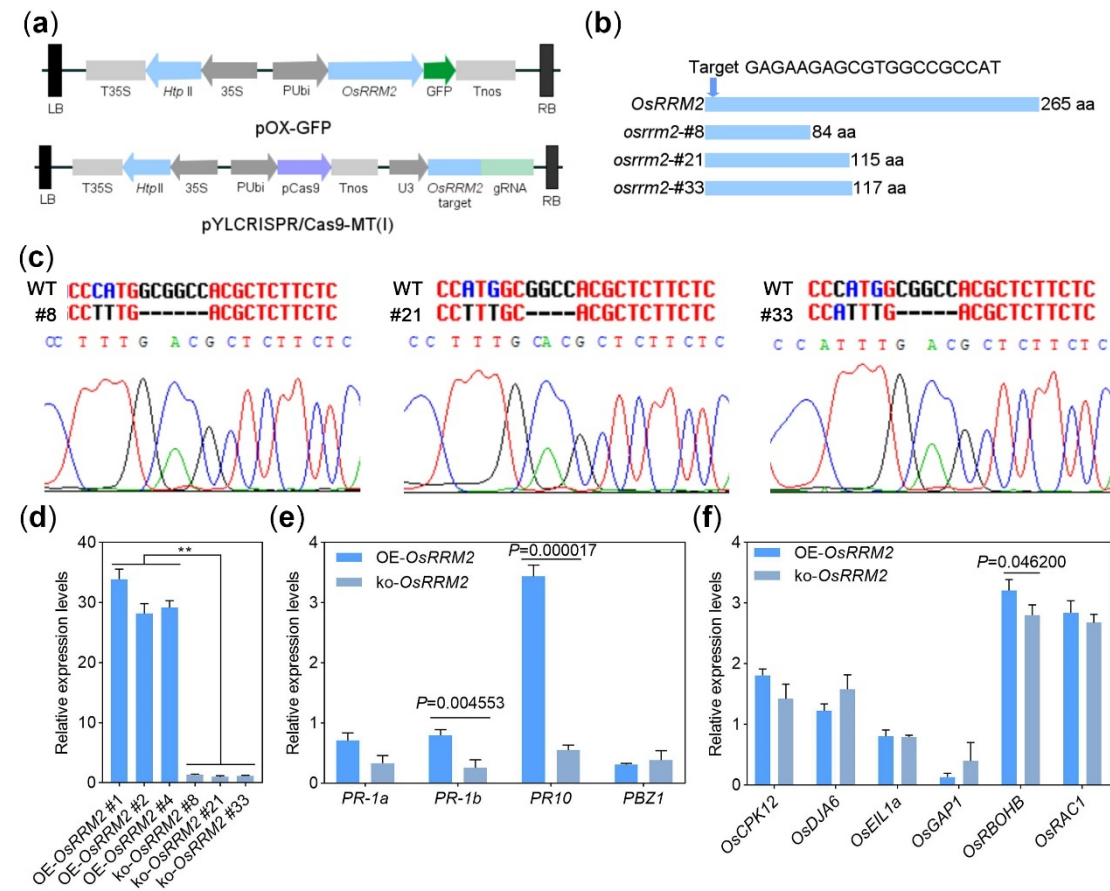

**Supplementary Figure S3.** Construction of the transgenic *OsRRM2* plants. (a) Plots of overexpression and knockout of *OsRRM2* plasmids; (b) The *OsRRM2* CRISPR/Cas9 target and plots of *OsRRM2* mutants; (c) Alignments and chromatograms of *OsRRM2* mutants; (d) Relative expression levels of *OsRRM2* in transgenic plants. \*\* indicates the data were at  $P < 0.01$  level according to the Students' t-test; (e) The relative expression levels of resistance-related genes in *OsRRM2* transgenic plants; (f) The relative expression levels of ROS-related genes in *OsRRM2* transgenic plants. The values are shown as mean  $\pm$  SD (n=3).  $\beta$ -actin was tested as an internal reference and the expression levels in *Pik-H4* NILs were regarded as the control groups.

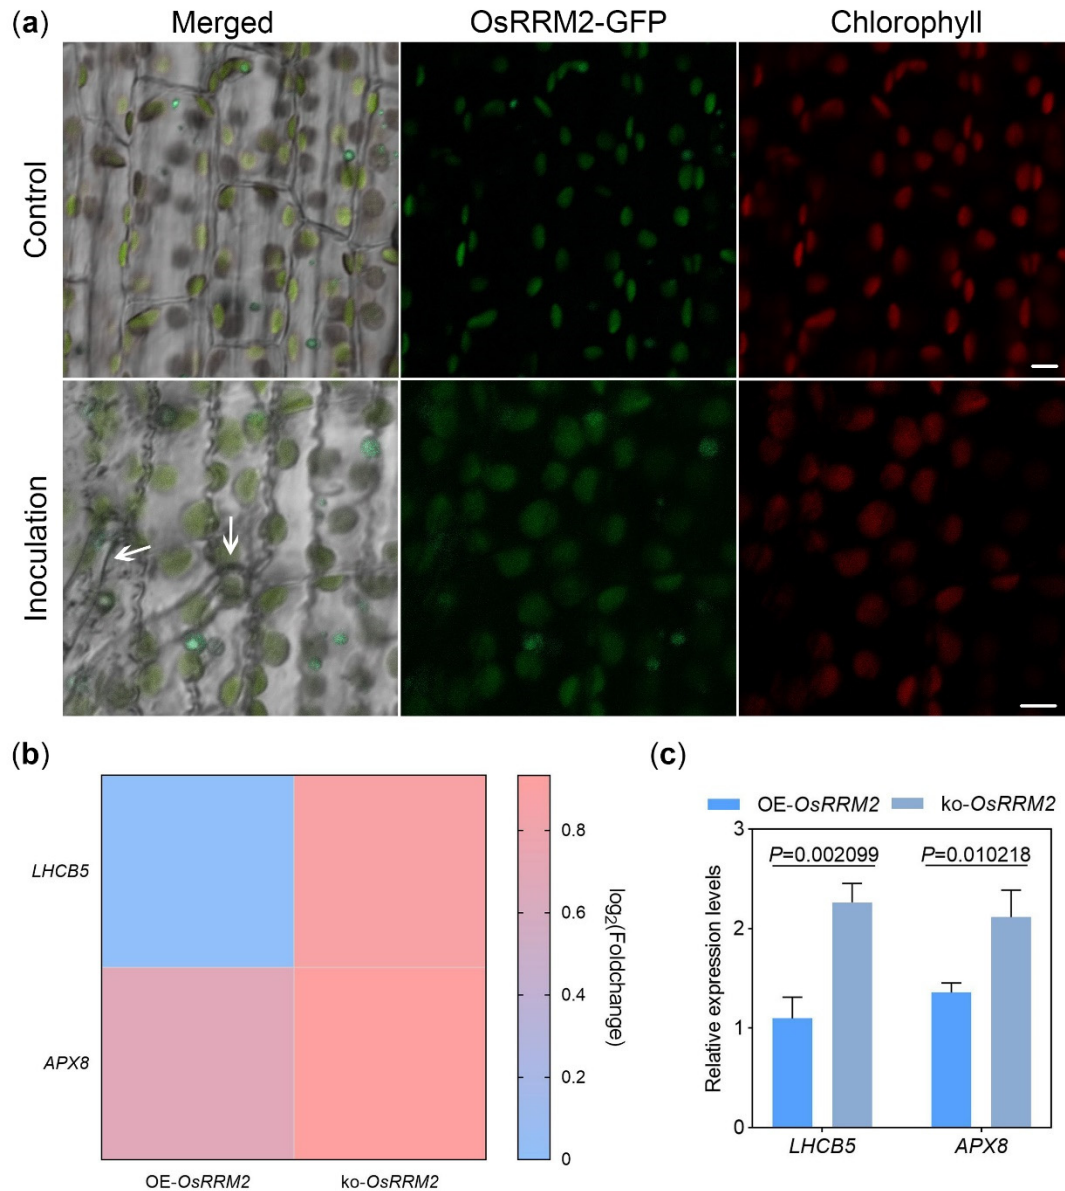

**Supplementary Figure S4.** OsRRM2 location upon rice blast infection and effect on chloroplast immune genes. **(a)** In vivo subcellular location of OsRRM2-GFP. The arrows indicate the hyphae of rice blast fungus. Scale bars = 5  $\mu$ m; **(b)** Transcriptome analysis of chloroplast immune-related genes; **(c)** Relative expression levels of chloroplast immune-related genes.  *$\beta$ -actin* was tested as an internal reference and the expression levels in *Pik-H4* NILs were regarded as the control groups. The values are shown as mean  $\pm$  SD (n=3). The data were compared according to the Students' t-test.



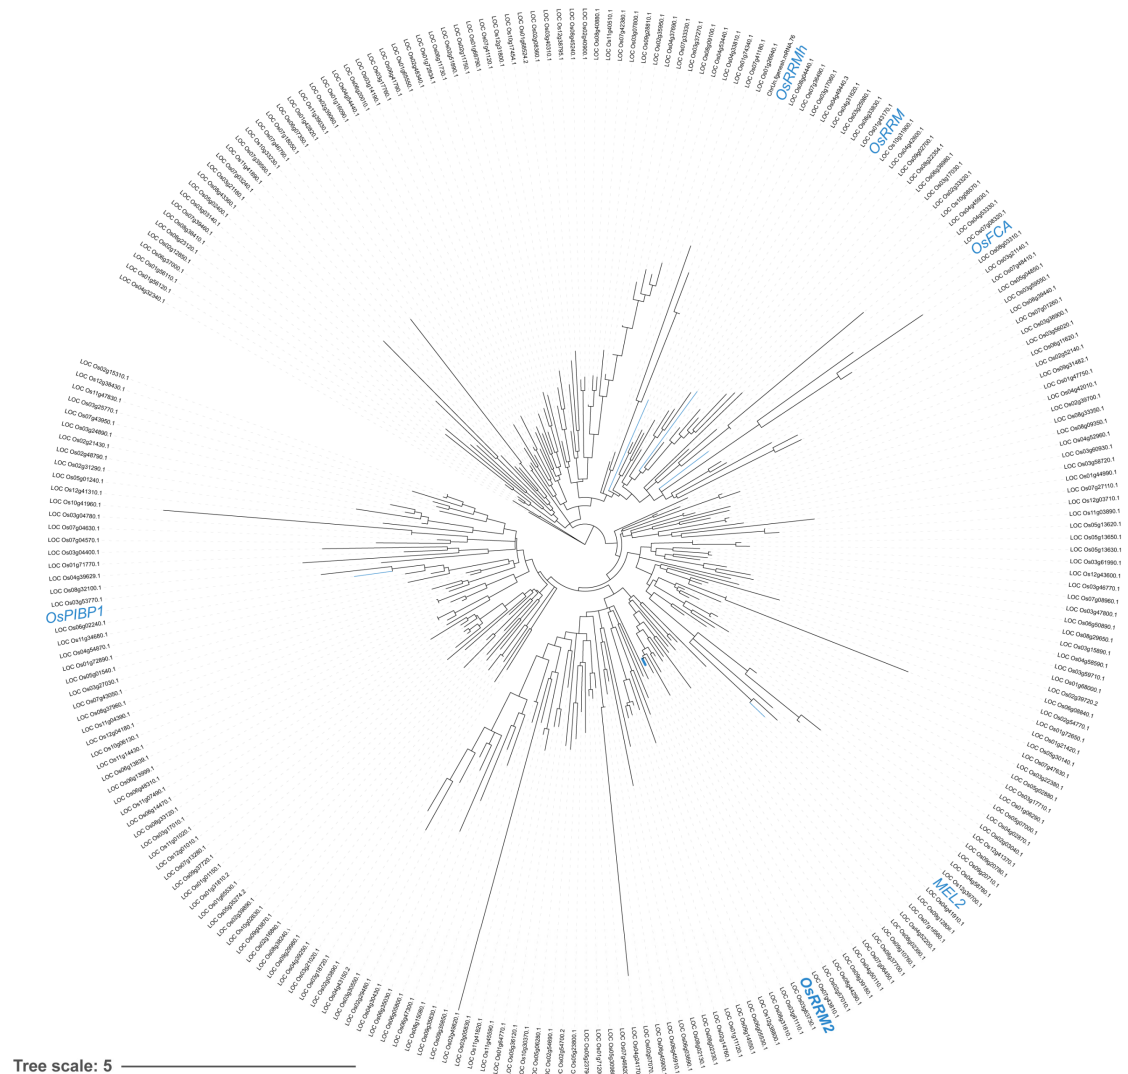

**Supplementary Figure S5.** Phylogenetic analysis of rice RRM family proteins. The reported RRM proteins are shaded in blue.
